# Supplementary material
Source: Springer Nature journal article supplement (https://www.springermedizin.de/resource/supplementary/12961_2010_142_MOESM2_ESM.pdf/9571528)
Supplement: MOESM2 [file 9571528]

## Systematic reviews

Judgements about the impacts of policies

## Local evidence

Judgements about modifying factors, needs, values, costs, and the availability of resources

Judgements about the expected benefits, harms and costs of policy options

## Judgements about trade-offs

### Desirable impacts

- Health benefits
- Less burden
- Savings

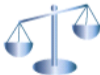

### Undesirable impacts

- Harms
- More burden
- Costs

Well-informed health policy decisions
